# Supplementary material for: ChartSweep: A HIPAA-compliant Tool to Automate Chart Review for Plastic Surgery Research
Source: PubMed Central journal article supplement — Plast Reconstr Surg Glob Open. 2021 Jun 15;9(6):e3633. doi: 10.1097/GOX.0000000000003633 (PMC8205215; doi:10.1097/gox.0000000000003633), 2021-06-15
Supplement: gox-9-e3633-s001.pdf [file gox-9-e3633-s001.pdf]

```
from selenium import webdriver
```

```
from selenium.webdriver.common.by import By
```

```
from selenium.webdriver.common.keys import Keys
```

```
from selenium.webdriver.support.ui import WebDriverWait
```

```
from selenium.webdriver.support.expected_conditions import
```

```
presence_of_element_located
```

```
#This example requires Selenium WebDriver 3.13 or newer
```

```
with webdriver.Firefox() as driver:
```

```
    wait = WebDriverWait(driver, 10)
```

```
    driver.get("https://google.com/ncr")
```

```
    driver.find_element(By.NAME, "q").send_keys("cheese" + Keys.RETURN)
```

```
    first_result=wait.until(presence_of_element_located((By.CSS_SELECTOR,  
    "h3>div")))
```

```
    print(first_result.get_attribute("textContent"))
```
