# Supplementary material for: ChartSweep: A HIPAA-compliant Tool to Automate Chart Review for Plastic Surgery Research
Source: PubMed Central journal article supplement — Plast Reconstr Surg Glob Open. 2021 Jun 15;9(6):e3633. doi: 10.1097/GOX.0000000000003633 (PMC8205215; doi:10.1097/gox.0000000000003633), 2021-06-15
Supplement: gox-9-e3633-s002.pdf [file gox-9-e3633-s002.pdf]

```
from pynput.mouse import Button, Controller
```

```
mouse = Controller()
```

```
# Read pointer position
```

```
print('The current pointer position is {}'.format(
    mouse.position))
```

```
# Set pointer position
```

```
mouse.position = (10, 20)
```

```
print('Now we have moved it to {}'.format(
    mouse.position))
```

```
# Move pointer relative to current position
```

```
mouse.move(5, -5)
```

```
# Press and release
```

```
mouse.press(Button.left)
```

```
mouse.release(Button.left)
```

```
# Double click; this is different from pressing and releasing
```

```
# twice on macOS
```

```
mouse.click(Button.left, 2)
```

```
# Scroll two steps down
```

```
mouse.scroll(0, 2)
```
